# Supplementary figures and images for: Associations between Maternal Diet, Body Composition and Gut Microbial Ecology in Pregnancy
Source: MDPI journal article supplement (doi:10.3390/nu13093295), 2021-09-21

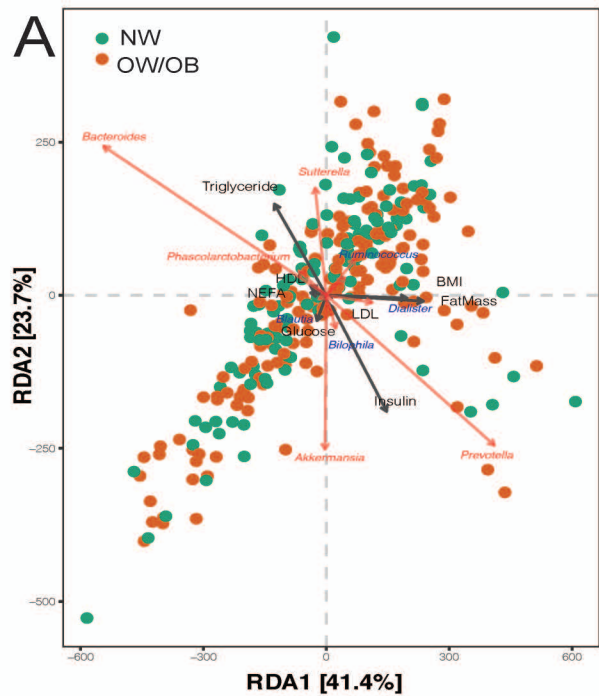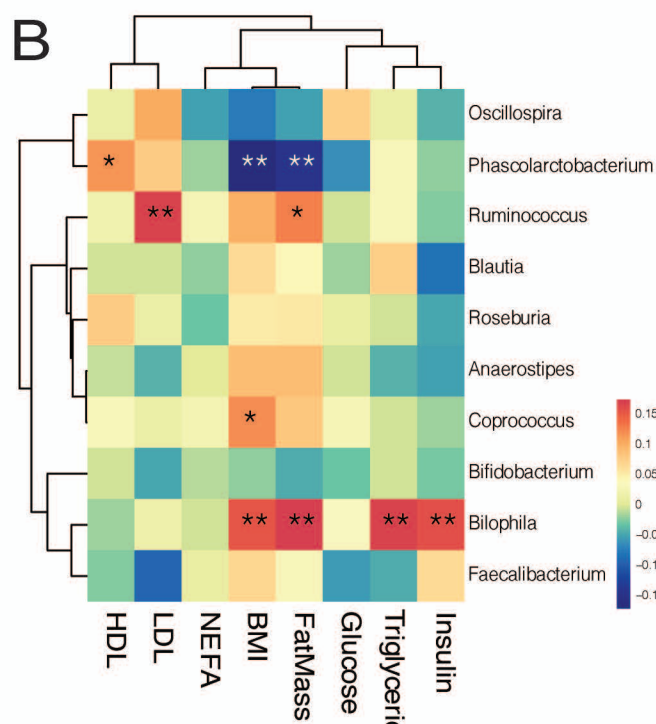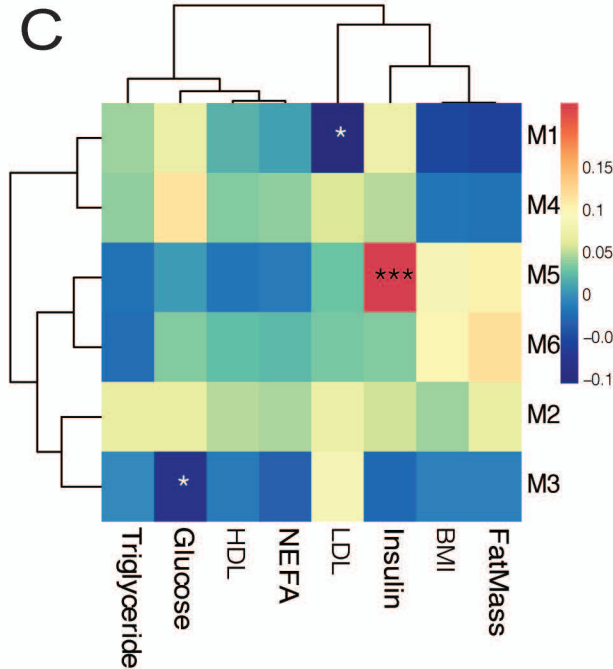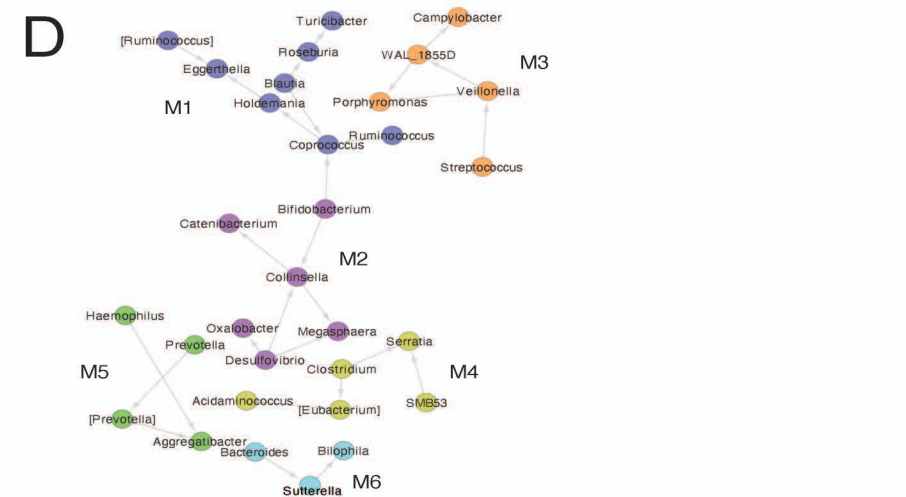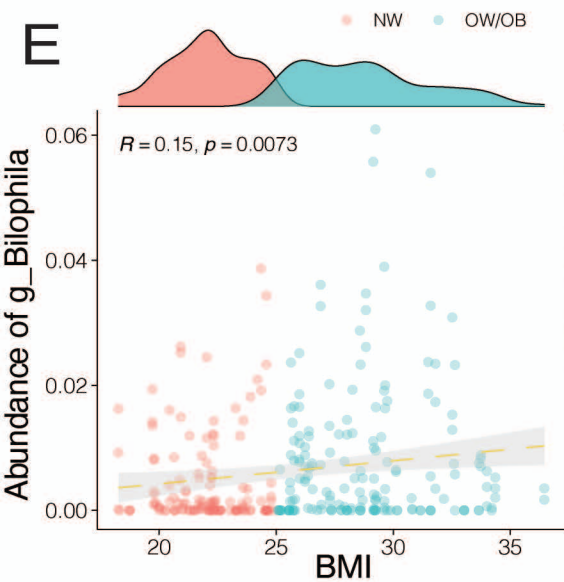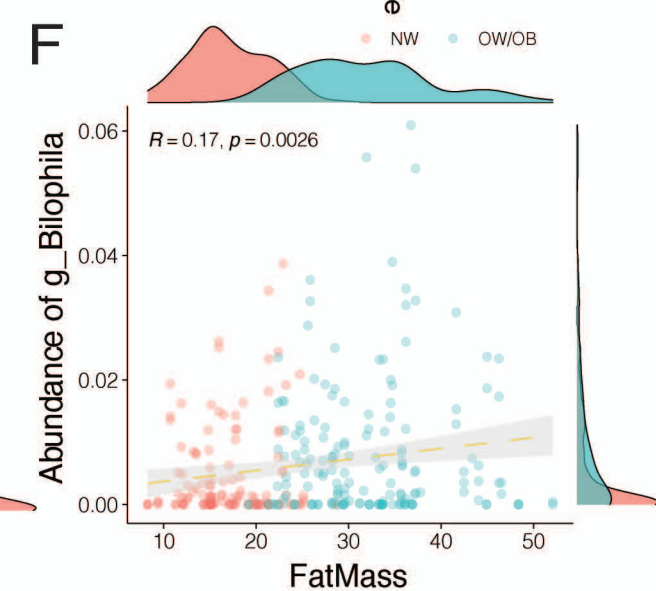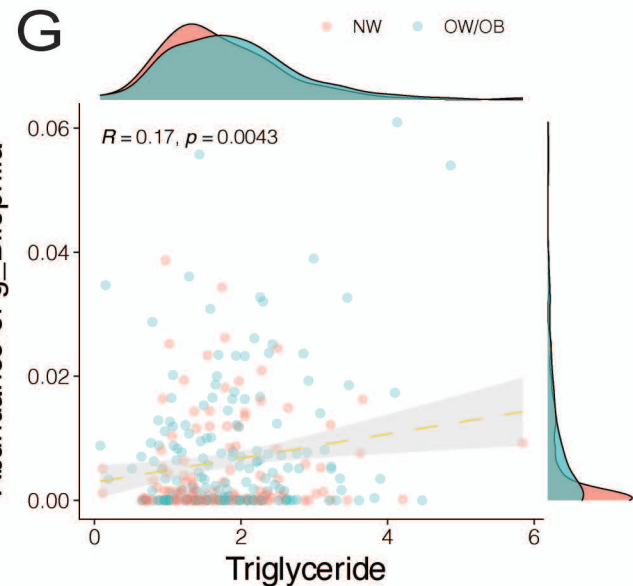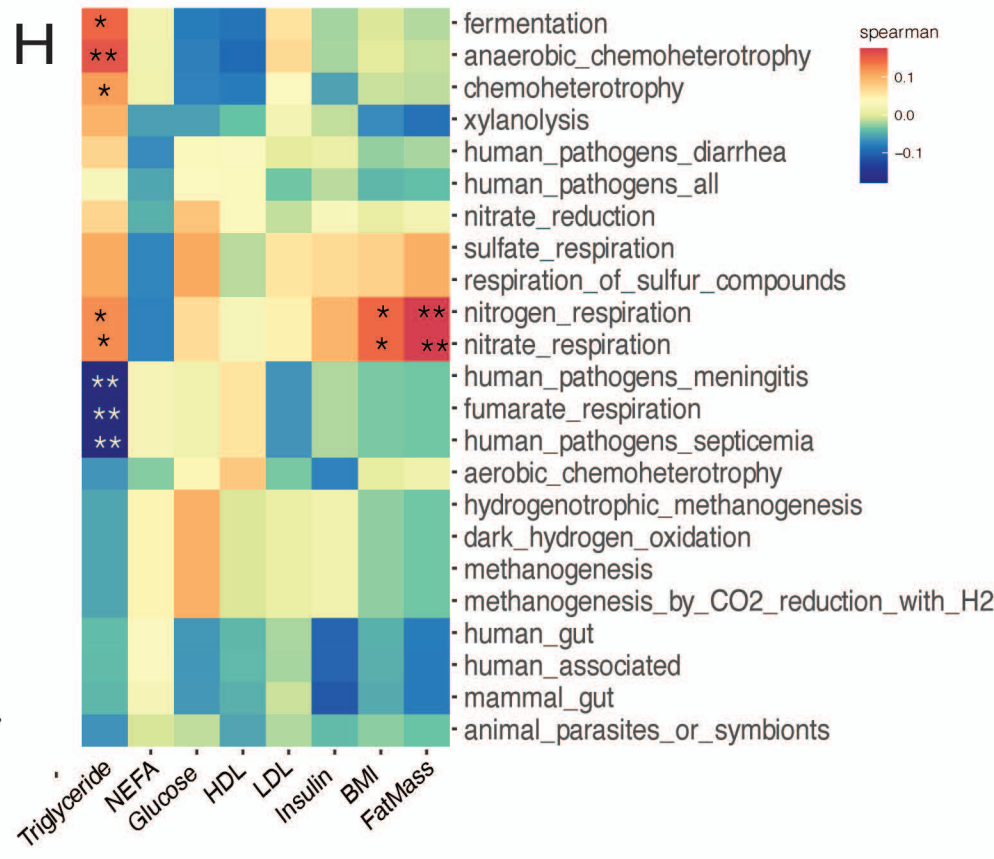

Supplement: s1 [file s1]
